# Supplementary material for: Down to the Rivers: A Geophysical Investigation at Étiolles (France) to Reconstruct the Magdalenian Occupation
Source: MDPI journal article supplement (doi:10.3390/rs16030519), 2024-01-29
Supplement: s1 [file s1]

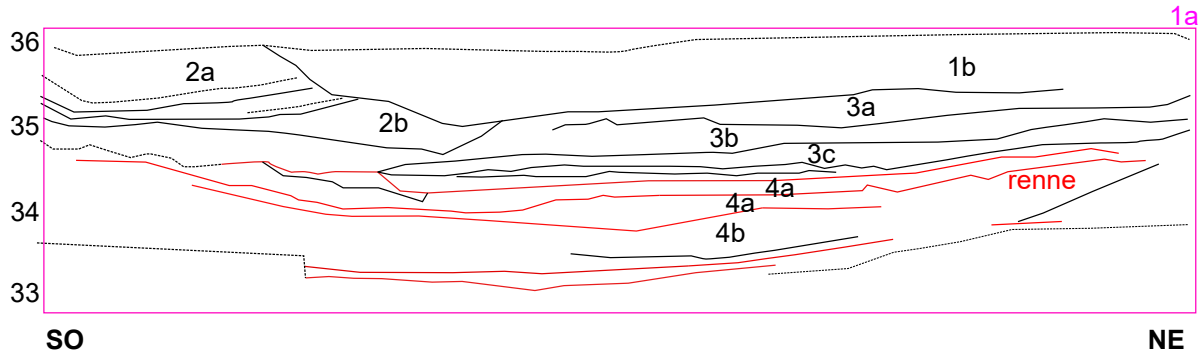

- 1b:light beige loam
- 2a:stratified silt and gravel
- 2b:brown loam
- 3a:brown loam
- 3b:grey loam
- 3c:brown loam
- 4a:beige loam
- 4b:beige-grey loam
- archaeological layer
