# Supplementary figures and images for: Down to the Rivers: A Geophysical Investigation at Étiolles (France) to Reconstruct the Magdalenian Occupation
Source: MDPI journal article supplement (doi:10.3390/rs16030519), 2024-01-29

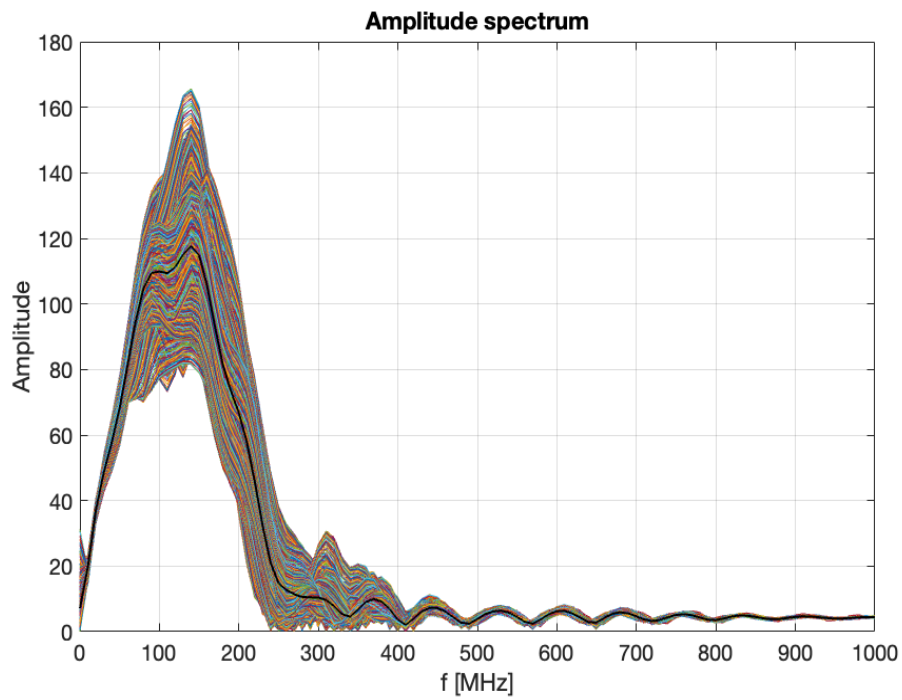

Supplement: s1 [file s1]

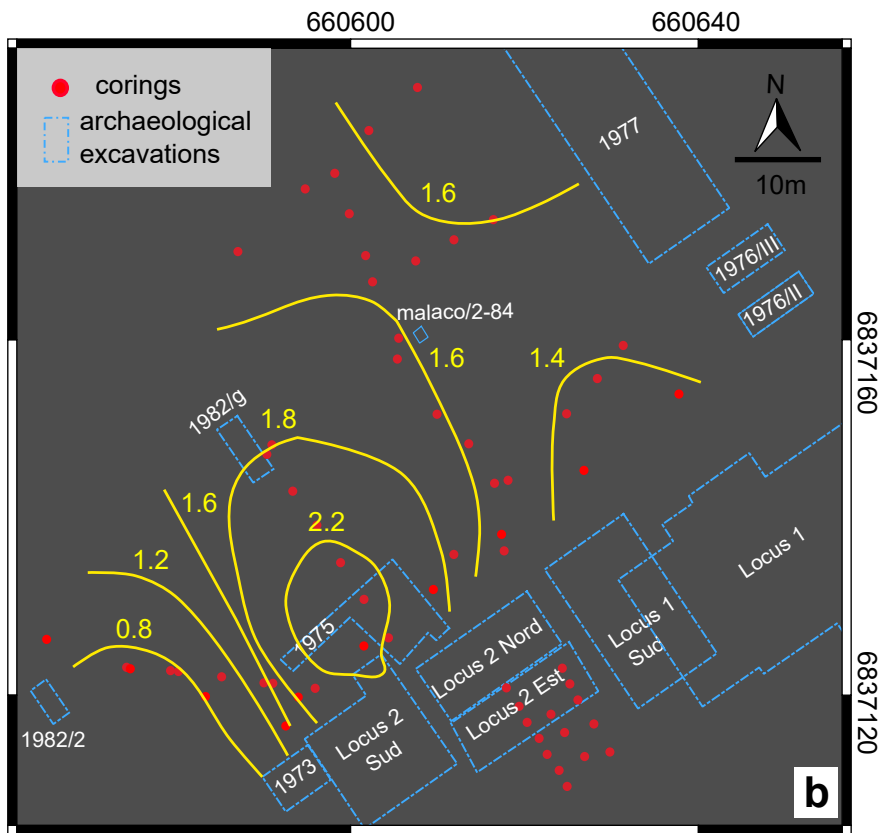

RFG93v1/ Lambert-93 EPSG:2154

Supplement: s1 [file s1]

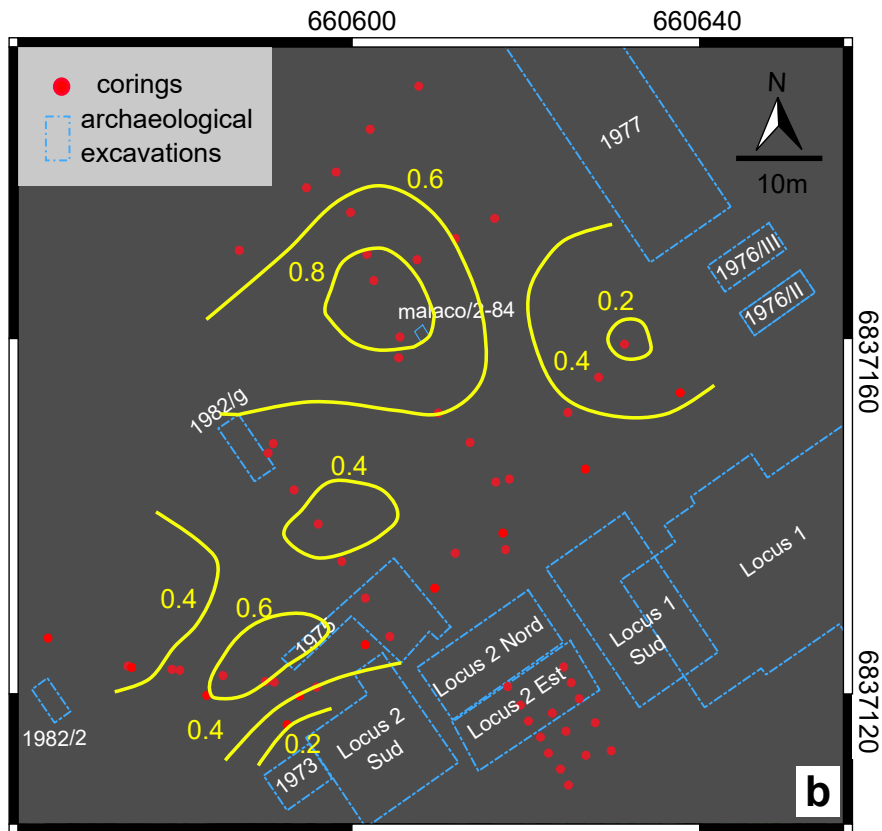

RFG93v1/ Lambert-93 EPSG:2154

Supplement: s1 [file s1]
